# Supplementary material for: The green synthesis of PdO/Pd anchored on hierarchical ZnO microflowers with a synthetic effect for the efficient catalytic reduction of 4-nitrophenol
Source: Royal Society of Chemistry journal article supplement (doi:10.1039/d0nj00001a), 2020-01-01
Supplement: d0nj00001a1.pdf [file d0nj00001a1.pdf]

## Supporting Information

### **Green synthesis of PdO/Pd anchored on hierarchical ZnO microflowers with synthetic effect for efficient catalytic reduction of 4-nitrophenol**

Mufei Liu <sup>a, b</sup>, Hao Yang <sup>a</sup>, Zewen Xu <sup>a</sup>, Wenlu Ma <sup>b</sup>, Fang Cui <sup>b</sup>, George Lu <sup>\*a, c</sup>,  
Lin Xu <sup>d</sup>, Tiejun Cui <sup>\*b</sup>

a. College of Chemical Engineering, China University of Petroleum (East China), Qingdao, 266580, P. R. China. E-mail: [George.Lu@ZJHighNew.com](mailto:George.Lu@ZJHighNew.com)

b. School of Chemistry and Chemical Engineering, Harbin Institute of Technology, Harbin, 150001, P. R. China. E-mail: [cuit@hit.edu.cn](mailto:cuit@hit.edu.cn) Fax:(+86) 0451-86403646

c. Zhejiang HighNew Environmental Technologies Co. Ltd., Hangzhou, 311121, P. R. China.

d. Advanced Materials Institute, Qilu University of Technology (Shandong Academy of Sciences), Jinan, 250014, P. R. China.

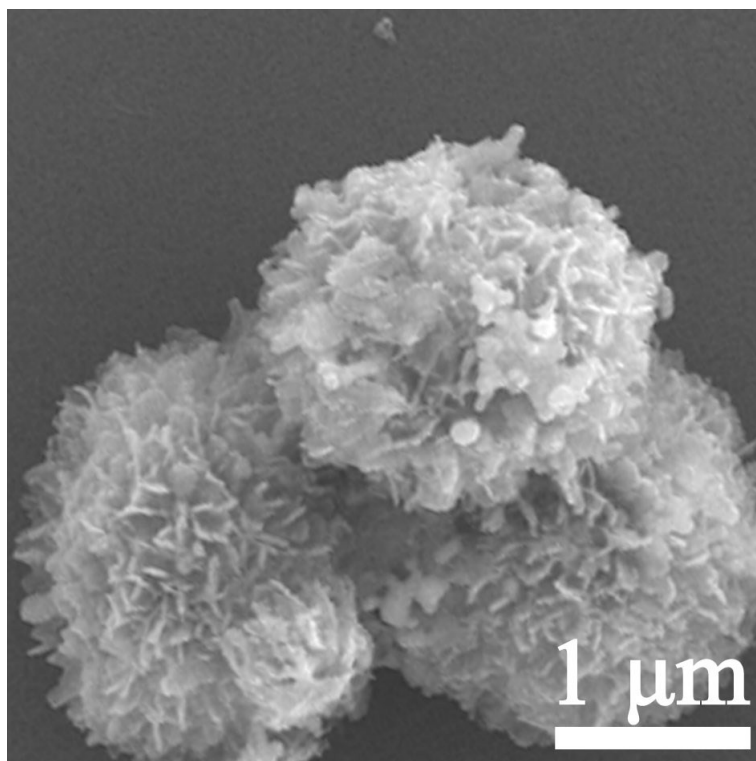

Fig. S1 SEM image of Zn(MAA)<sub>2</sub> nanoflowers.

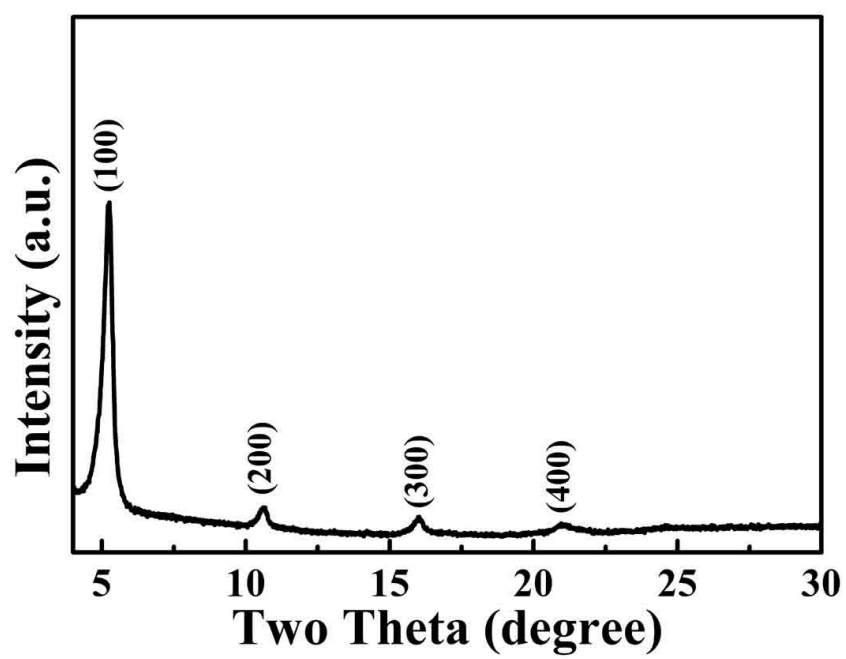

Fig. S2 XRD pattern of Zn(MAA)<sub>2</sub> MFs.

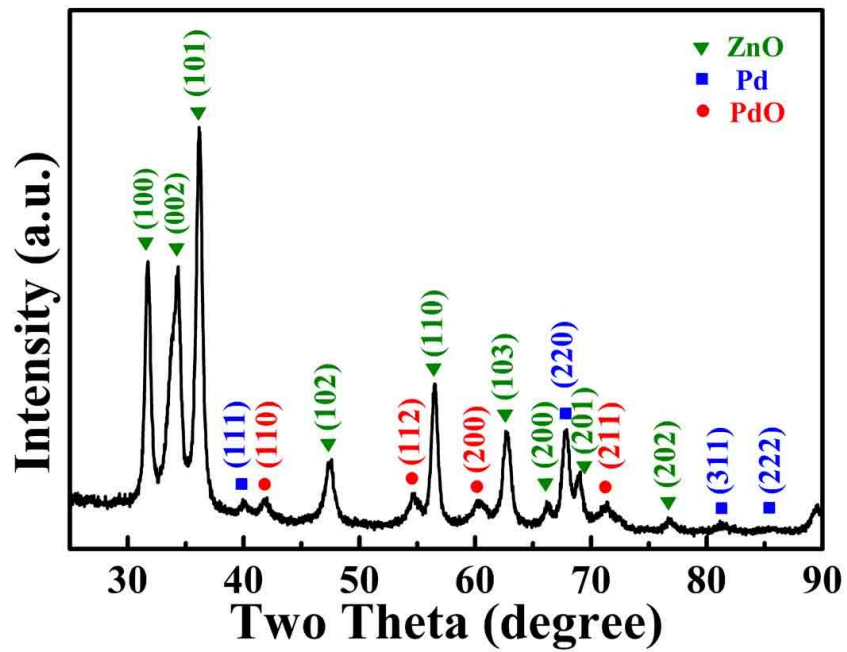

Fig. S3 XRD pattern of ZnO/PdO/Pd MFs obtained by calcinating the ZnO/Pd(II) MFs in the air at 340 °C for 40 min (heating rate: 1 °C min<sup>-1</sup>)

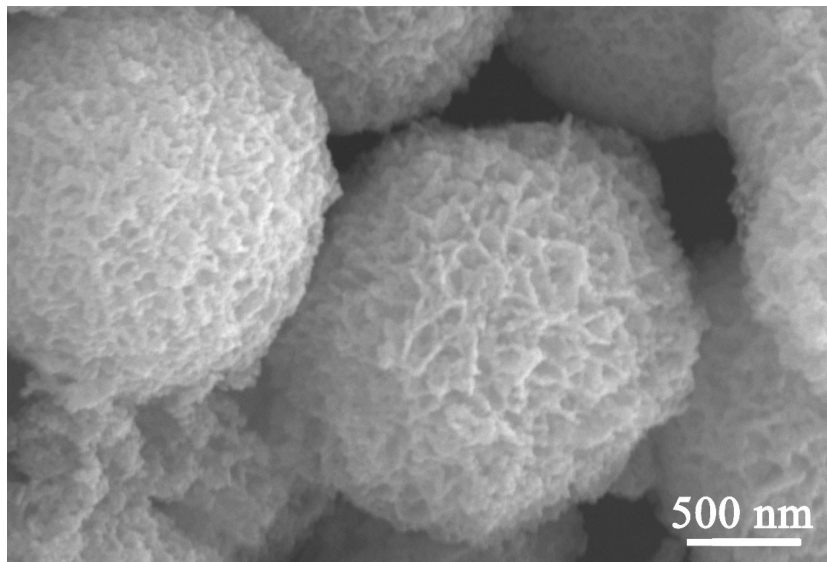

Fig. S4 SEM image of ZnO/PdO/Pd nanoflowers.

**Table S1 catalytic performance of various catalysts reported for the reduction of 4-NP  $k$  is the rate constant calculated by the relationship between  $\ln C/C_0$  and the reaction time.  $k_a$  is calculated by using the equation  $k_a=k/a$ , where  $a$  is the mass of active substance in catalytic process.**

| Entry | Catalyst                              | $k$ (min <sup>-1</sup> ) | $k_a$ (s <sup>-1</sup> g <sup>-1</sup> ) | Ref.      |
|-------|---------------------------------------|--------------------------|------------------------------------------|-----------|
| 1     | Pd/CS-4                               | 0.40                     | 6.6                                      | S1        |
| 2     | Natrolite<br>zeolite/palladium        | 4.02                     | 44.8                                     | S2        |
| 3     | Pd/ZnO@Zn                             | 0.28                     | 77                                       | S3        |
| 4     | Pt/Fe <sub>2</sub> O <sub>3</sub>     | 0.24                     | 98                                       | S4        |
| 5     | PtO <sub>2</sub> /ZnO-30              | 0.52                     | 117                                      | S5        |
| 6     | Pd/carbon nanotube                    | 0.63                     | 125                                      | S6        |
| 7     | Ni@Pd/KCC-1                           | 1.224                    | 510                                      | S7        |
| 8     | Pd/N-doped carbon                     | 0.366                    | 542                                      | S8        |
| 9     | PdNPs/Cit-GO                          | 0.20                     | 656.7                                    | S9        |
| 10    | cellulose<br>nanocrystals/Pd          | 0.34                     | 1339                                     | S10       |
| 11    | Pd/Fe <sub>3</sub> O <sub>4</sub> -Ag | 1.98                     | 1736                                     | S11       |
| 12    | ZnO/PdO/Pd                            | 0.55                     | 2065                                     | This work |

## References

- S1. S. Tang, S. Vongehr, G. He, L. Chen, X. Meng, J. Colloid Interface Sci. 2012, 375, 125-133.
- S2. A. Hatamifard, M. Nasrollahzadeh and J. Lipkowski, RSC Adv. 2015, DOI: 10.1039/C5RA18476B.
- S3. Q. Hu, X. Liu, X. Tang, D. Min, D. Shi, and W. Zhang, RSC ADV, 2017, 7, 7964-7972.
- S4. P. Zhang, X. Yang, H. Peng, D. Liu, H. Lu, J. Wei, and J. Gui, CATAL COMMUN, 2017, 100, 214-218.
- S5. X. Yang, Y. Li, P. Zhang, R. Zhou, H. Peng, D. Liu, and J. Gui, ACS APPL MATER INTER, 2018, 10, 23154-23162.
- S6. X. Gu, W. Qi, X. Xu, Z. Sun, L. Zhang, W. Liu, X. Pan, and D. Su, NANOSCALE, 2014, 6, 6609-6616.
- S7. Z. Dong, X. Le, C. Dong, W. Zhang, X. Li, and J. Ma, Applied Catalysis B: Environmental, 2015, 162, 372-380.
- S8. X. Wu, H. Zhou, New J. Chem., DOI: 10.1039/C7NJ01947E.
- S9 B. Su, Y. Jia, S. Zhang, X. Chen, and M. Oyama, Chem. Lett. 2014, 43, 919-921.
- S10. X. Wu, C. Lu, W. Zhang, G. Yuan, R. Xiong, and X. Zhang, J. Mater. Chem. A, DOI: 10.1039/c3ta11236e.
- S11. K. Jiang, H. Zhang, Y. Yang, R. Mothes, H. Lang, and W. Cai, CHEM COMMUN, 2011, 47, 11924.
